# Supplementary material
Source: Springer Nature journal article supplement (https://www.springermedizin.de/resource/supplementary/12889_2010_2226_MOESM1_ESM.pdf/9485046)

# Chlamydia Rates in MSM, 1999-2008, San Francisco

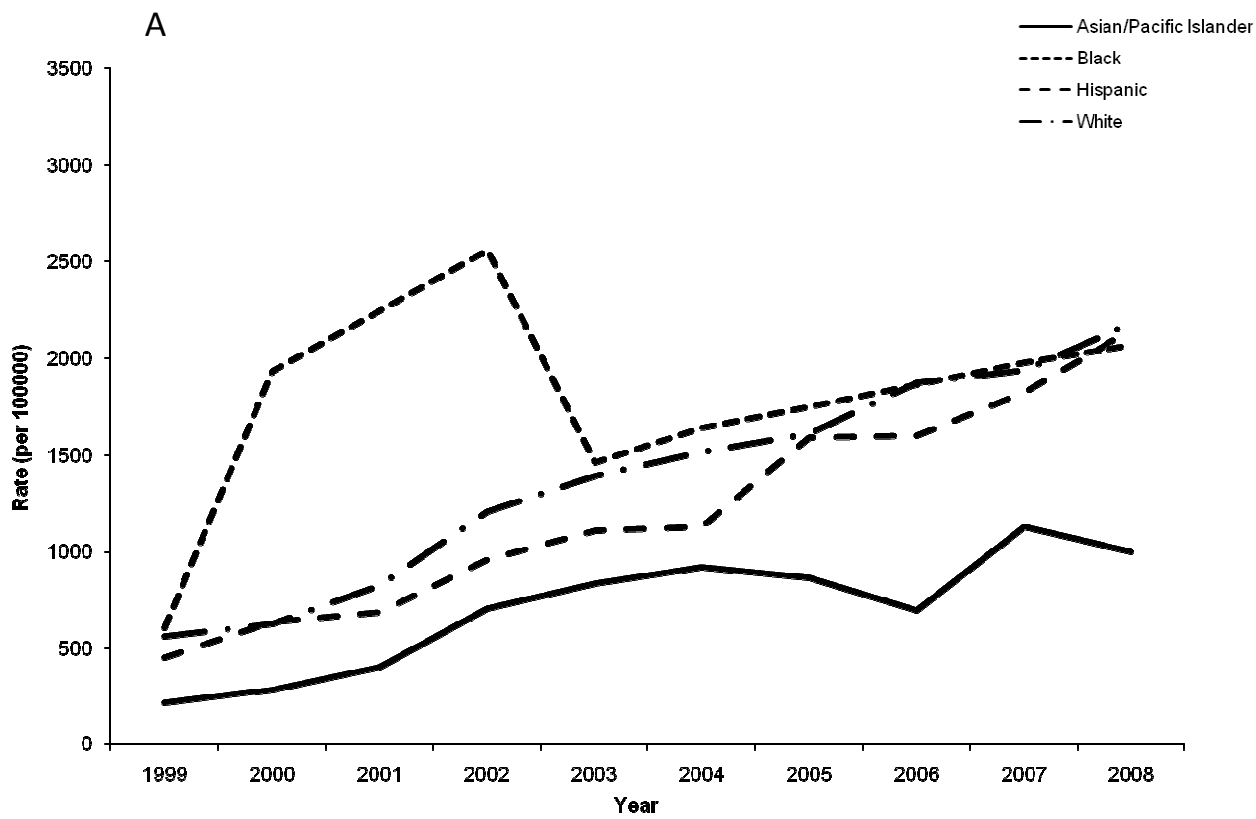

# Chlamydia Rates In Non-MSM, 1999-2008, San Francisco

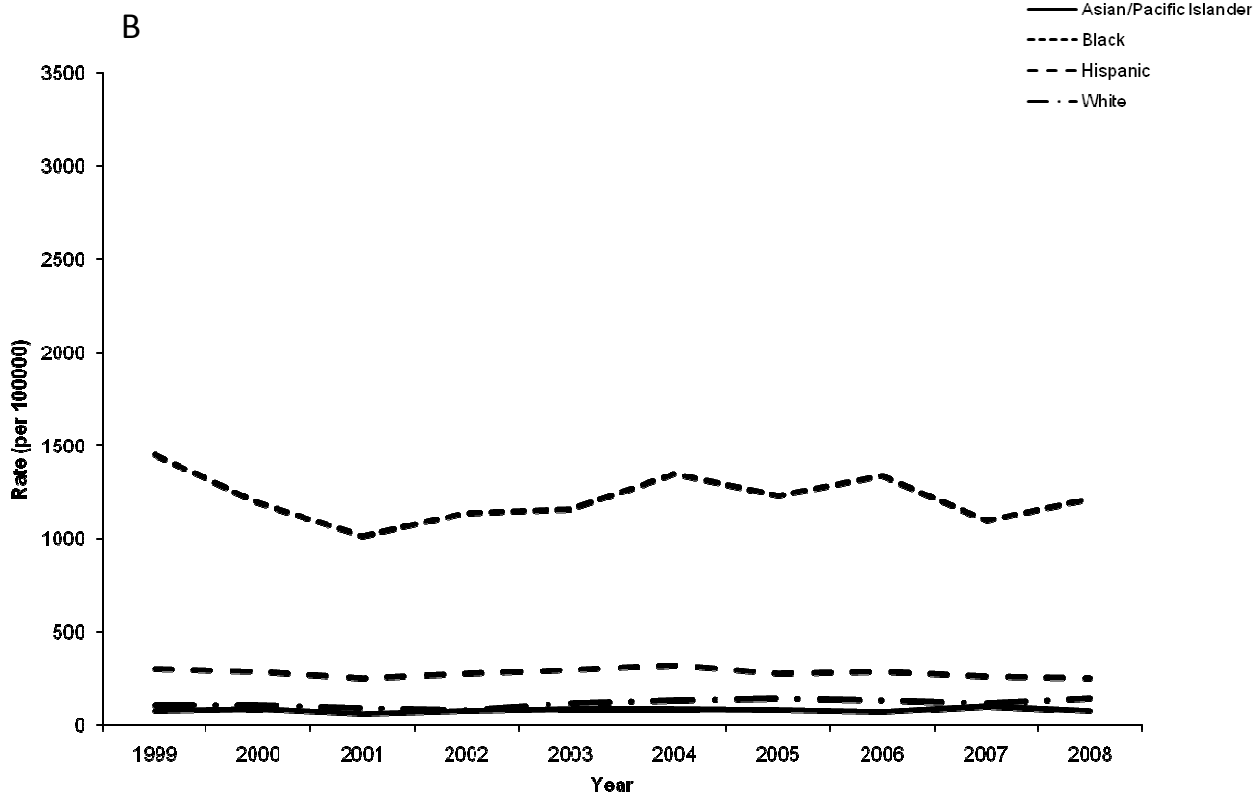

Supplement: MOESM1 [file 9485046]
